# Supplementary material for: A Porous π-Stacked Self-Assembly of Cup-Shaped Palladium Complex for Iodine Capture
Source: MDPI journal article supplement (doi:10.3390/molecules28072881), 2023-03-23
Supplement: s1 [file s1]

# **A Porous $\pi$ -Stacked Self-Assembly of Cup-Shaped Palladium Complex for Iodine Capture**

Lin-Lin Li<sup>1,4,5</sup>, Min Huang<sup>3,4,5</sup>, Ting Chen<sup>3,4,5</sup>, Xiao-Feng Xu<sup>4,5</sup>, Zhu Zhuo<sup>4,5</sup>,

Wei Wang<sup>4,5</sup>, You-Gui Huang<sup>2,4,5\*</sup>

<sup>1</sup> College of Chemistry, Fuzhou University, Fuzhou, 350108, China

<sup>2</sup> Fujian Science & Technology Innovation Laboratory for Optoelectronic Information of China, Fuzhou, Fujian, 350108, China

<sup>3</sup> College of Chemistry and Materials Science, Fujian Normal University, Fuzhou, Fujian, 350002, P. R. China

<sup>4</sup> CAS Key Laboratory of Design and Assembly of Functional Nanostructures, and Fujian Provincial Key Laboratory of Nanomaterials, Fujian Institute of Research on the Structure of Matter, Chinese Academy of Sciences, China

<sup>5</sup> Xiamen Institute of Rare Earth Materials, Haixi Institute, Chinese Academy of Science, Xiamen 361021, China

**Table S1.** Crystallographic data of compound **1**.

| Compound                                        | <b>1</b>                                                        |
|-------------------------------------------------|-----------------------------------------------------------------|
| Formula                                         | Pd <sub>3</sub> C <sub>66</sub> H <sub>48</sub> N <sub>13</sub> |
| Formula weight                                  | 1342.37                                                         |
| Temp. (K)                                       | 200                                                             |
| Crystal System                                  | Cubic                                                           |
| Space group                                     | I-43m                                                           |
| <i>a</i> (Å)                                    | 26.0030(2)                                                      |
| <i>V</i> (Å <sup>3</sup> )                      | 17582.1(4)                                                      |
| <i>Z</i>                                        | 8                                                               |
| $\rho_{cal.}$ (g cm <sup>-3</sup> )             | 1.014                                                           |
| $\mu$                                           | 0.643                                                           |
| <i>F</i> (000)                                  | 5384                                                            |
| $\theta$ range (°)                              | 4.43–67.346                                                     |
| Reflections ( <i>I</i> > 2 $\sigma$ )           | 5662                                                            |
| <i>R</i> <sub>1</sub> ( <i>I</i> > 2 $\sigma$ ) | 0.0459                                                          |
| <i>wR</i> <sub>2</sub> ( <i>all</i> )           | 0.1342                                                          |
| <i>GOF</i> on <i>F</i> <sup>2</sup>             | 1.083                                                           |
| CCDC#                                           | 2245193                                                         |

<sup>[a]</sup> $R_1 = \Sigma||F_o| - |F|| / \Sigma|F_o|$  and  $wR_2 = [\Sigma w(F_o^2 - F_c^2)^2 / \Sigma wF_o^4]^{1/2}$  for  $F_o^2 > 2\sigma(F_o^2)$

**Table S2.** Fitting the iodine adsorption kinetics of compound **1**.

| adsorbate | I <sub>2</sub> vapor                                         |                                            |                       | Dissolved I <sub>2</sub>                                     |                                            |                       |
|-----------|--------------------------------------------------------------|--------------------------------------------|-----------------------|--------------------------------------------------------------|--------------------------------------------|-----------------------|
| model     | pseudo first-order                                           |                                            |                       | pseudo second-order                                          |                                            |                       |
| parameter | <i>k</i> <sub>1</sub> (g g <sup>-1</sup> min <sup>-1</sup> ) | <i>Q</i> <sub>e</sub> (g g <sup>-1</sup> ) | <i>R</i> <sup>2</sup> | <i>k</i> <sub>2</sub> (g g <sup>-1</sup> min <sup>-1</sup> ) | <i>Q</i> <sub>e</sub> (g g <sup>-1</sup> ) | <i>R</i> <sup>2</sup> |
|           | 1.0×10 <sup>-4</sup>                                         | 1.81                                       | 0.996                 | 3.0×10 <sup>-3</sup>                                         | 0.603                                      | 0.977                 |

**Table S3.** The comparison of I<sub>2</sub> adsorption capacities for various adsorbents.

| Adsorbents | I <sub>2</sub> vapor (g g <sup>-1</sup> ) | Adsorption of I <sub>2</sub> in solution (g g <sup>-1</sup> ) | Ref.      |
|------------|-------------------------------------------|---------------------------------------------------------------|-----------|
| Cu-BTC@PES | 0.639                                     | 0.260                                                         | 41        |
| DUT-68     | 1.08                                      | /                                                             | 42        |
| P-TzTz     | /                                         | 0.494                                                         | 43        |
| ZIF-8@PU   | /                                         | 0.33                                                          | 44        |
| <b>1</b>   | 1.81                                      | 0.60                                                          | This work |

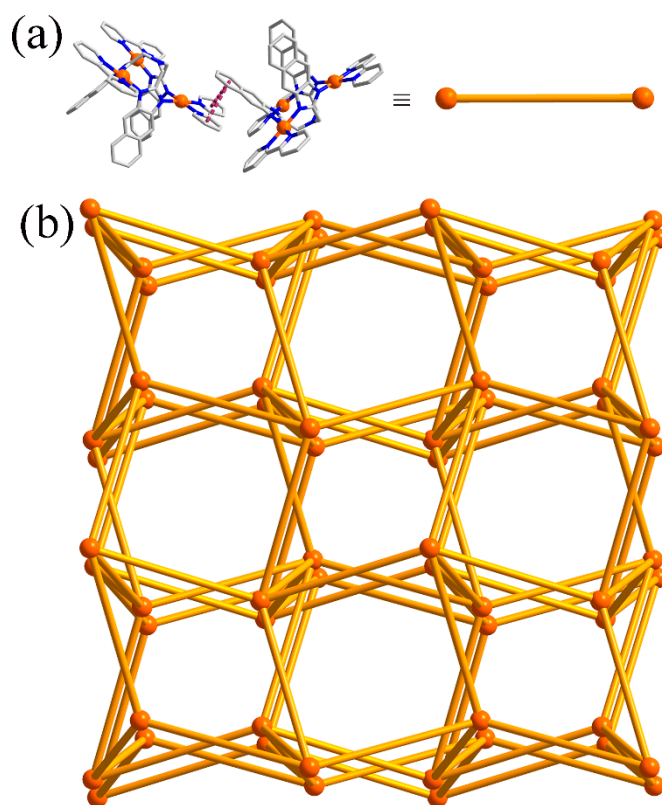

**Figure S1.** (a) The simplification of the network of compound **1**. (b) The simplified **pcu** network of the supramolecular framework of compound **1**.

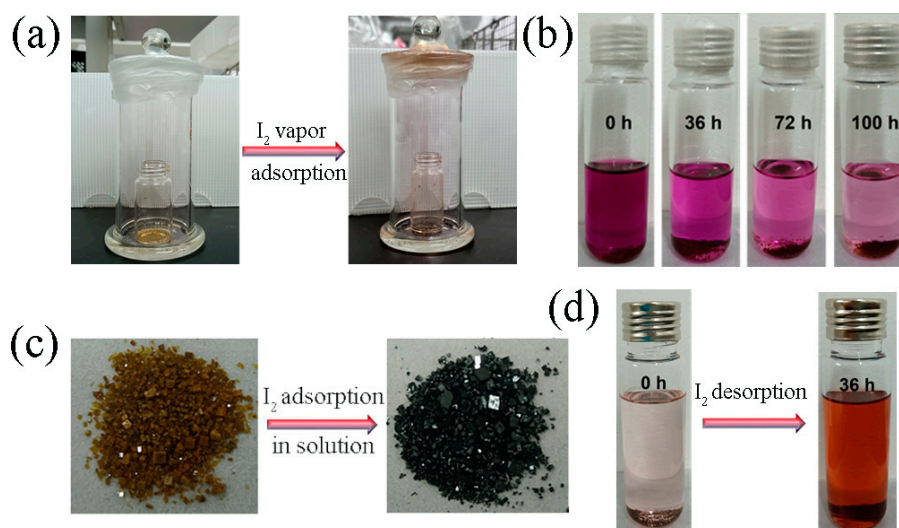

**Figure S2.** (a) The setup for I<sub>2</sub> vapor adsorption. (b) Photographs showing color changes of the I<sub>2</sub>/cyclohexane solution as a function of time when 0.050 g compound **1** was immersed in the solution. (c) Photographs showing the color change of the crystals of compound **1** before and after dissolved I<sub>2</sub> adsorption. (d) Photographs showing the release of I<sub>2</sub> from I<sub>2</sub>@**1** in CH<sub>2</sub>Cl<sub>2</sub>.

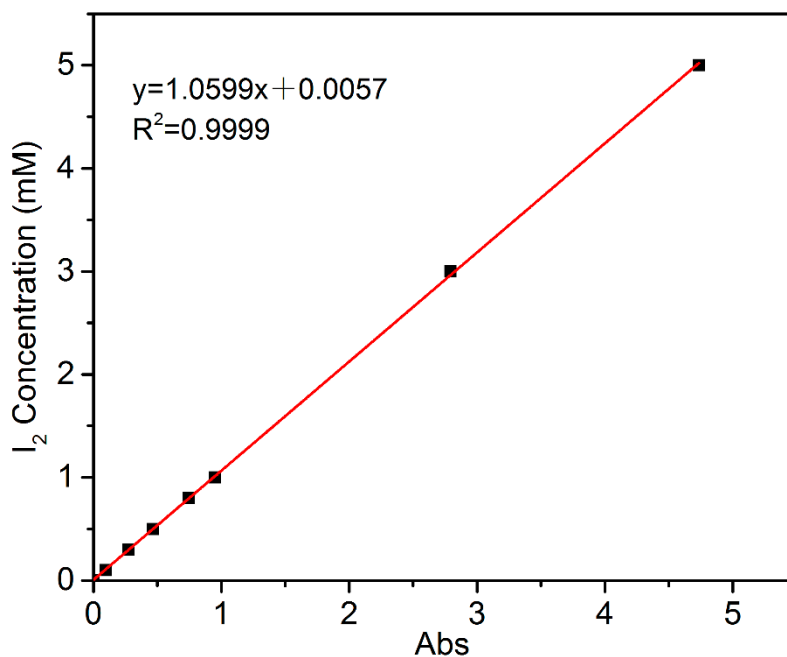

**Figure S3.** Standard plot between absorbance ( $\lambda = 523$  nm) and I<sub>2</sub> concentration of the solution of I<sub>2</sub> in cyclohexane.
